# Supplementary material for: FABry Disease Patient-Reported Outcome-GastroIntestinal (FABPRO-GI): A new Fabry disease-specific gastrointestinal outcomes instrument
Source: Springer Nature journal article supplement (doi:10.1007/s11136-021-02847-9), 2021-04-29
Supplement: MOESM1 [file 19118086]

**SUPPLEMENTARY TABLES AND FIGURES**

**FABry Disease Patient-Reported Outcome-GastroIntestinal (FABPRO-GI): A New Fabry Disease-specific Gastrointestinal Outcomes Instrument**

**Journal:** *Quality of Life Research*

Alan L. Shields,<sup>1</sup> Roger E. Lamoureux,<sup>1</sup> Fiona Taylor,<sup>1</sup> Jay Barth,<sup>2</sup> Andrew E. Mulberg,<sup>2</sup> Vivian Kessler,<sup>2</sup> Nina Skuban<sup>2</sup>

<sup>1</sup>Adelphi Values, Boston, MA, USA; <sup>2</sup>Amicus Therapeutics, Inc., Cranbury, NJ, USA

**Corresponding Author:** Alan L. Shields

Adelphi Values

290 Congress Street, 6th Floor

Boston, MA 02210

Email: [Alan.Shields@adelphivalues.com](mailto:Alan.Shields@adelphivalues.com)

**Online Resource Table 1.** Saturation Grid for Fabry Disease-related GI Signs and Symptoms

| <b>Concept</b>           | <b>First ~25%<br/>of interviews<br/>vs next<br/>~25% of<br/>interviews</b> | <b>First ~50%<br/>of interviews<br/>vs next<br/>~25% of<br/>interviews</b> | <b>First ~75%<br/>of interviews<br/>vs next<br/>~25% of<br/>interviews</b> | <b>Total</b> | <b>Number of<br/>concepts elicited<br/>in first 75% of<br/>interviews/<br/>Total concepts<br/>elicited (%)</b> |
|--------------------------|----------------------------------------------------------------------------|----------------------------------------------------------------------------|----------------------------------------------------------------------------|--------------|----------------------------------------------------------------------------------------------------------------|
| Diarrhea                 | 5 vs 3                                                                     | 8 vs 1                                                                     | 9 vs 4                                                                     | 13           | 12/13 (92.3%)                                                                                                  |
| Bloating                 | 4 vs 1                                                                     | 5 vs 3                                                                     | 8 vs 2                                                                     | 10           |                                                                                                                |
| Constipation             | 4 vs 3                                                                     | 7 vs 3                                                                     | 10 vs 0                                                                    | 10           |                                                                                                                |
| Cramping                 | 1 vs 3                                                                     | 4 vs 2                                                                     | 6 vs 3                                                                     | 9            |                                                                                                                |
| Stomach pain             | 2 vs 3                                                                     | 5 vs 2                                                                     | 7 vs 0                                                                     | 7            |                                                                                                                |
| Nausea                   | 0 vs 2                                                                     | 2 vs 2                                                                     | 4 vs 2                                                                     | 6            |                                                                                                                |
| Gas                      | 2 vs 1                                                                     | 3 vs 1                                                                     | 4 vs 0                                                                     | 4            |                                                                                                                |
| Heartburn                | 1 vs 1                                                                     | 2 vs 2                                                                     | 4 vs 0                                                                     | 4            |                                                                                                                |
| Upset stomach            | 3 vs 0                                                                     | 3 vs 1                                                                     | 4 vs 0                                                                     | 4            |                                                                                                                |
| Gas pain                 | 2 vs 0                                                                     | 2 vs 1                                                                     | 3 vs 0                                                                     | 3            |                                                                                                                |
| Frequent bowel movements | 1 vs 1                                                                     | 2 vs 0                                                                     | 2 vs 0                                                                     | 2            |                                                                                                                |
| Burping                  | 0 vs 0                                                                     | 0 vs 1                                                                     | 1 vs 0                                                                     | 1            |                                                                                                                |
| Vomiting                 | 0 vs 0                                                                     | 0 vs 0                                                                     | 0 vs 1                                                                     | 1            |                                                                                                                |

GI, gastrointestinal.

**Online Resource Figure 1. Literature Search Flow Diagram<sup>a</sup>**

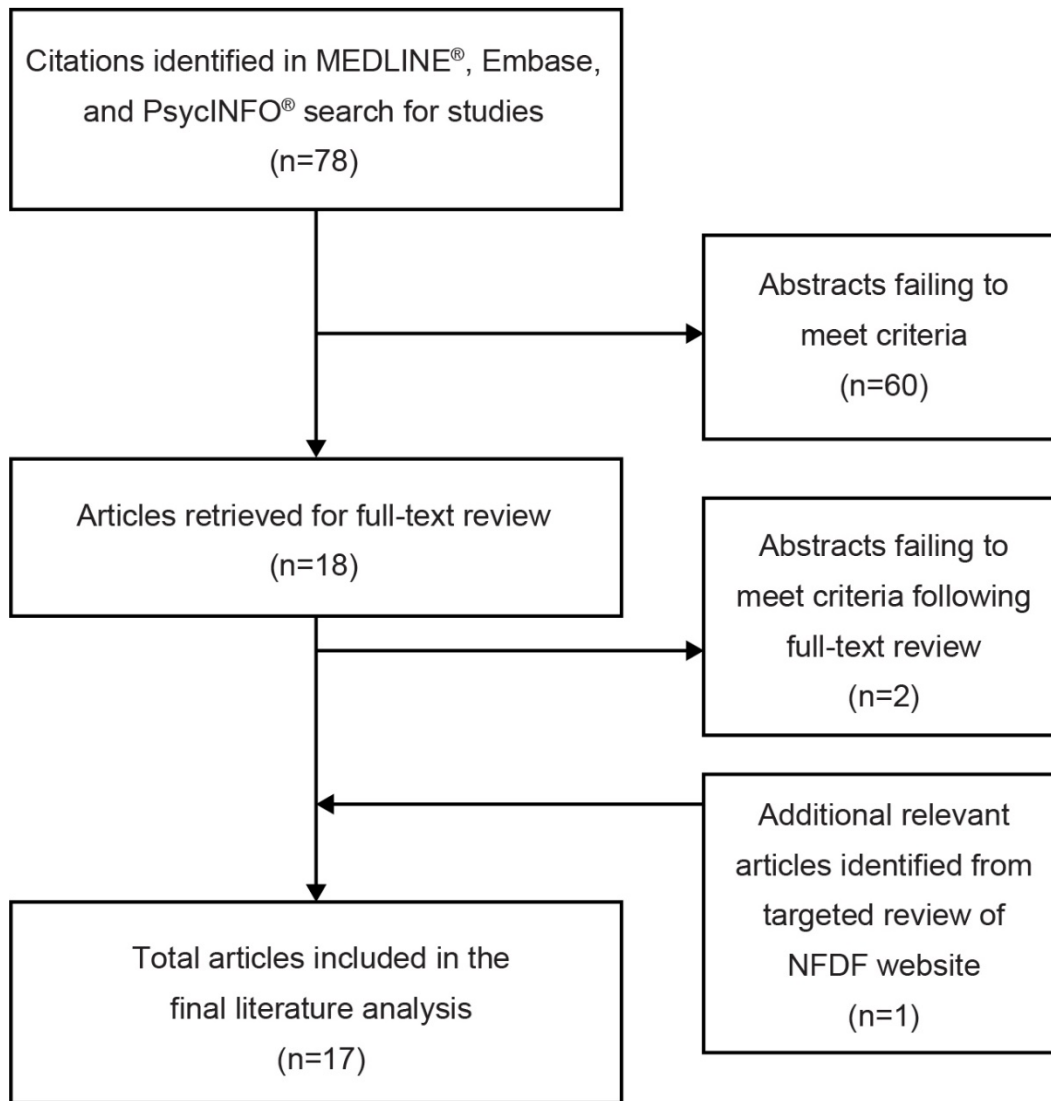

GI, gastrointestinal; NFDF, National Fabry Disease Foundation.

<sup>a</sup>Articles identified in the literature review were considered relevant if they primarily focused on the GI symptoms of Fabry disease. Articles were excluded if they primarily focused on the pathogenesis, genetics, or molecular histology of Fabry disease; primarily focused on non-GI symptoms of Fabry disease; or solely discussed Fabry disease in a population <16 years of age.
